# Supplementary material
Source: Springer Nature journal article supplement (https://www.springermedizin.de/resource/supplementary/12911_2013_730_MOESM2_ESM.pdf/9526230)
Supplement: MOESM2 [file 9526230]

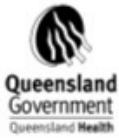

# Metro South Health Service District

## Indigenous Health Check: Age 5-14

Community Health

|             |  |
|-------------|--|
| UR Number   |  |
| Surname     |  |
| Other Names |  |
| DOB         |  |
| Sex         |  |

An \* indicates a mandatory field.

### A. PATIENT DETAILS

|                                                             |                                                    |
|-------------------------------------------------------------|----------------------------------------------------|
| Age: *                                                      | <input type="text"/>                               |
| Is there consent by parent/carer to perform health check? * | <input type="radio"/> Yes <input type="radio"/> No |

|                                                        |                                                                                                            |
|--------------------------------------------------------|------------------------------------------------------------------------------------------------------------|
| Consent for health assessment to be used in research * | <input type="radio"/> Yes <input type="radio"/> No                                                         |
| Had a previous 715 (5-14) at this practice?            | <input type="radio"/> Yes <input type="radio"/> No <input checked="" type="radio"/> Missing                |
| Is there any new medical and family history?           | <input type="radio"/> Yes <input type="radio"/> No <input checked="" type="radio"/> Missing                |
| Mother's Name:                                         | Mother's Age: <input type="text"/> Mother's URN: <input type="text"/><br><input type="radio"/> Not in ERIC |
| Father's Name:                                         | Father's Age: <input type="text"/> Father's URN: <input type="text"/><br><input type="radio"/> Not in ERIC |

**OR**

|                                           |                      |
|-------------------------------------------|----------------------|
| Carer's Name (and relationship to child): | <input type="text"/> |
|-------------------------------------------|----------------------|

|                     |                      |              |                      |
|---------------------|----------------------|--------------|----------------------|
| Sibling Name        | <input type="text"/> | Sibling Age: | <input type="text"/> |
| <b>Add Siblings</b> |                      |              |                      |

|                                            |                                                                                                                          |
|--------------------------------------------|--------------------------------------------------------------------------------------------------------------------------|
| Single Parent:                             | <input type="radio"/> Yes <input type="radio"/> No <input checked="" type="radio"/> Missing                              |
| Mother Employed:                           | <input type="radio"/> Yes <input type="radio"/> No <input type="radio"/> Unsure <input checked="" type="radio"/> Missing |
| Father Employed:                           | <input type="radio"/> Yes <input type="radio"/> No <input type="radio"/> Unsure <input checked="" type="radio"/> Missing |
| Other people involved in the child's care: | <input type="text"/>                                                                                                     |

### Indigenous Status

|           |                                                                                                                                                                               |
|-----------|-------------------------------------------------------------------------------------------------------------------------------------------------------------------------------|
| Child: *  | <input type="radio"/> Aboriginal <input type="radio"/> Torres Strait <input type="radio"/> Both <input checked="" type="radio"/> Missing                                      |
| Mother: * | <input type="radio"/> Aboriginal <input type="radio"/> Torres Strait <input type="radio"/> Both <input type="radio"/> Non-Indigenous <input checked="" type="radio"/> Missing |

|           |                                                                                                                                                                               |
|-----------|-------------------------------------------------------------------------------------------------------------------------------------------------------------------------------|
|           |                                                                                                                                                                               |
| Father: * | <input type="radio"/> Aboriginal <input type="radio"/> Torres Strait <input type="radio"/> Both <input type="radio"/> Non-Indigenous <input checked="" type="radio"/> Missing |

### B. PREVIOUS HEALTH CHECKS

|                                                                       |                                                                                                                          |
|-----------------------------------------------------------------------|--------------------------------------------------------------------------------------------------------------------------|
| Has the patient had a previous Medicare item 715 (5-14) Health Check? | <input type="radio"/> Yes <input type="radio"/> No <input type="radio"/> Unsure <input checked="" type="radio"/> Missing |
| Has the patient had a paediatric review in the last 12 months         | <input type="radio"/> Yes <input type="radio"/> No <input type="radio"/> Unsure <input checked="" type="radio"/> Missing |

### C. IMMUNISATION STATUS

|                                                  |                                                                                                                          |
|--------------------------------------------------|--------------------------------------------------------------------------------------------------------------------------|
| Is the patient's immunisation status up to date? | <input type="radio"/> Yes <input type="radio"/> No <input type="radio"/> Unsure <input checked="" type="radio"/> Missing |
| Comments:                                        | <div style="border: 1px solid #ccc; height: 20px;"></div>                                                                |

### D. MEDICAL HISTORY

|                                                                |                                                                                                                                     |
|----------------------------------------------------------------|-------------------------------------------------------------------------------------------------------------------------------------|
| <b>Birth</b>                                                   |                                                                                                                                     |
| What was the mode of delivery?                                 | <input type="radio"/> Vaginal <input type="radio"/> Caesarean <input type="radio"/> Unsure <input checked="" type="radio"/> Missing |
| What was the gestation (weeks) at birth? *                     | k <input style="width: 40px;" type="text"/>                                                                                         |
| What was the birth weight (grams)? *                           | <input style="width: 40px;" type="text"/> g                                                                                         |
| Were there any complications during or shortly after delivery? | <input type="radio"/> Yes <input type="radio"/> No <input checked="" type="radio"/> Missing                                         |
| If yes please specify:                                         | <div style="border: 1px solid #ccc; height: 20px;"></div>                                                                           |
| Were there any other antenatal/ postnatal issues of concern?   | <input type="radio"/> Yes <input type="radio"/> No <input checked="" type="radio"/> Missing                                         |
| If yes please specify:                                         | <div style="border: 1px solid #ccc; height: 20px;"></div>                                                                           |
| Did the child receive neonatal screening for hearing?          | <input type="radio"/> Yes <input type="radio"/> No <input type="radio"/> Unsure <input checked="" type="radio"/> Missing            |
| What was the outcome?                                          | <input type="radio"/> Pass <input type="radio"/> Fail <input checked="" type="radio"/> Missing                                      |
| Regular Snoring                                                | <input type="radio"/> Yes <input type="radio"/> No <input type="radio"/> Unsure <input checked="" type="radio"/> Missing            |
| Number of URTIs in the past year?                              | <input style="width: 40px;" type="text"/>                                                                                           |
| Any constipation in the past year?                             | <input type="radio"/> Yes <input type="radio"/> No <input checked="" type="radio"/> Missing                                         |
| <b>Past Medical History</b>                                    |                                                                                                                                     |
| Growth faltering/Failure to Thrive:                            | <input type="radio"/> Yes <input type="radio"/> No <input type="radio"/> Unsure <input checked="" type="radio"/> Missing            |
|                                                                | <div style="border: 1px solid #ccc; height: 20px;"></div>                                                                           |

|                                                               |                                                                                                                          |
|---------------------------------------------------------------|--------------------------------------------------------------------------------------------------------------------------|
| Recurrent chest infection:                                    | <input type="radio"/> Yes <input type="radio"/> No <input type="radio"/> Unsure <input checked="" type="radio"/> Missing |
| Pneumonia:                                                    | <input type="radio"/> Yes <input type="radio"/> No <input type="radio"/> Unsure <input checked="" type="radio"/> Missing |
| Rheumatic Heart Disease:                                      | <input type="radio"/> Yes <input type="radio"/> No <input type="radio"/> Unsure <input checked="" type="radio"/> Missing |
| Asthma:                                                       | <input type="radio"/> Yes <input type="radio"/> No <input type="radio"/> Unsure <input checked="" type="radio"/> Missing |
| Ear infections:                                               | <input type="radio"/> Yes <input type="radio"/> No <input type="radio"/> Unsure <input checked="" type="radio"/> Missing |
| Skin infections:                                              | <input type="radio"/> Yes <input type="radio"/> No <input type="radio"/> Unsure <input checked="" type="radio"/> Missing |
| Other:                                                        | <input type="radio"/> Yes <input type="radio"/> No <input type="radio"/> Unsure <input checked="" type="radio"/> Missing |
| If Other, please specify - hospitalisations, injuries, burns: | <input type="text"/>                                                                                                     |

**Relevant Family Medical History (Mother or Father):**

|                                                           |                                                                                                                          |
|-----------------------------------------------------------|--------------------------------------------------------------------------------------------------------------------------|
| Hypertension:                                             | <input type="radio"/> Yes <input type="radio"/> No <input type="radio"/> Unsure <input checked="" type="radio"/> Missing |
| Gestational Diabetes:                                     | <input type="radio"/> Yes <input type="radio"/> No <input type="radio"/> Unsure <input checked="" type="radio"/> Missing |
| CVD:                                                      | <input type="radio"/> Yes <input type="radio"/> No <input type="radio"/> Unsure <input checked="" type="radio"/> Missing |
| Mental illness (e.g. depression, anxiety, schizophrenia): | <input type="radio"/> Yes <input type="radio"/> No <input type="radio"/> Unsure <input checked="" type="radio"/> Missing |
| Asthma/Atopy/Eczema:                                      | <input type="radio"/> Yes <input type="radio"/> No <input type="radio"/> Unsure <input checked="" type="radio"/> Missing |
| Other:                                                    | <input type="radio"/> Yes <input type="radio"/> No <input type="radio"/> Unsure <input checked="" type="radio"/> Missing |
| Please specify - if yes to any of the above:              | <input type="text"/>                                                                                                     |

**CHILD**

|                                                                  |                      |
|------------------------------------------------------------------|----------------------|
| <b>Current Medications (prescriptions and over the counter):</b> | <input type="text"/> |
| <b>Allergies/drug intolerances:</b>                              | <input type="text"/> |

**E. SOCIAL HISTORY /CARER CONCERNS**

|                                                                  |               |                                                                                             |
|------------------------------------------------------------------|---------------|---------------------------------------------------------------------------------------------|
| Who does the child live with? (e.g parent, grandparent, friend?) | Parent        | <input type="radio"/> Yes <input type="radio"/> No <input checked="" type="radio"/> Missing |
|                                                                  | Siblings      | <input type="radio"/> Yes <input type="radio"/> No <input checked="" type="radio"/> Missing |
|                                                                  | Grandparent   | <input type="radio"/> Yes <input type="radio"/> No <input checked="" type="radio"/> Missing |
|                                                                  | Foster Parent | <input type="radio"/> Yes <input type="radio"/> No <input checked="" type="radio"/> Missing |

|                                                                                   |                                                                                             |                                                                                             |
|-----------------------------------------------------------------------------------|---------------------------------------------------------------------------------------------|---------------------------------------------------------------------------------------------|
|                                                                                   | Friend                                                                                      | <input type="radio"/> Yes <input type="radio"/> No <input checked="" type="radio"/> Missing |
|                                                                                   | Other                                                                                       | <input type="radio"/> Yes <input type="radio"/> No <input checked="" type="radio"/> Missing |
| If Other, please specify:                                                         |                                                                                             |                                                                                             |
| Who is the primary carer of the child?                                            |                                                                                             |                                                                                             |
| How many people usually live at the house?                                        |                                                                                             |                                                                                             |
| Does the carer have any concerns about the child's development?                   | <input type="radio"/> Yes <input type="radio"/> No <input checked="" type="radio"/> Missing |                                                                                             |
| Any concerns about hearing?                                                       | <input type="radio"/> Yes <input type="radio"/> No <input checked="" type="radio"/> Missing |                                                                                             |
| Any concerns about talking?                                                       | <input type="radio"/> Yes <input type="radio"/> No <input checked="" type="radio"/> Missing |                                                                                             |
| Any concerns about vision?                                                        | <input type="radio"/> Yes <input type="radio"/> No <input checked="" type="radio"/> Missing |                                                                                             |
| If Yes to any of the above, please specify:                                       |                                                                                             |                                                                                             |
| <b>Stressful Life Events</b>                                                      |                                                                                             |                                                                                             |
| Have there been any stressful life events to cause you or your child to be upset? | <input type="radio"/> Yes <input type="radio"/> No <input checked="" type="radio"/> Missing |                                                                                             |
| Conflict at home?                                                                 | <input type="radio"/> Yes <input type="radio"/> No <input checked="" type="radio"/> Missing |                                                                                             |
| Family Deaths?                                                                    | <input type="radio"/> Yes <input type="radio"/> No <input checked="" type="radio"/> Missing |                                                                                             |
| Exposure to violence?                                                             | <input type="radio"/> Yes <input type="radio"/> No <input checked="" type="radio"/> Missing |                                                                                             |
| Illness to primary caregiver?                                                     | <input type="radio"/> Yes <input type="radio"/> No <input checked="" type="radio"/> Missing |                                                                                             |
| Abuse?                                                                            | <input type="radio"/> Yes <input type="radio"/> No <input checked="" type="radio"/> Missing |                                                                                             |
| Comments:                                                                         |                                                                                             |                                                                                             |
| Are there any concerns about the mother/carer's current well-being?               | <input type="radio"/> Yes <input type="radio"/> No <input checked="" type="radio"/> Missing |                                                                                             |
| If Yes, please specify (e.g. support network, stressors, mood, general health)    |                                                                                             |                                                                                             |
| <b>Domestic Violence/Abuse</b>                                                    |                                                                                             |                                                                                             |
| Are you ever afraid of your partner?                                              | <input type="radio"/> Yes <input type="radio"/> No <input checked="" type="radio"/> Missing |                                                                                             |
| In the last year, has your partner kicked, punched or otherwise hurt you?         | <input type="radio"/> Yes <input type="radio"/> No <input checked="" type="radio"/> Missing |                                                                                             |
| In the last year, has your partner threatened to hurt you?                        | <input type="radio"/> Yes <input type="radio"/> No <input checked="" type="radio"/> Missing |                                                                                             |
| Do you feel threatened or afraid of anyone in the                                 | <input type="radio"/> Yes <input type="radio"/> No <input checked="" type="radio"/> Missing |                                                                                             |

|                                                                                      |                                                                                             |
|--------------------------------------------------------------------------------------|---------------------------------------------------------------------------------------------|
| community?                                                                           |                                                                                             |
| Would you like help with any of this now?                                            | <input type="radio"/> Yes <input type="radio"/> No <input checked="" type="radio"/> Missing |
| Has the parent experienced abuse as a child? (emotional, neglect, physical, sexual): | <input type="radio"/> Yes <input type="radio"/> No <input checked="" type="radio"/> Missing |
| If yes, please comment as appropriate:                                               |                                                                                             |

### F. LEARNING AND BEHAVIOUR

|                                                                 |                                                                                                                                                                                         |
|-----------------------------------------------------------------|-----------------------------------------------------------------------------------------------------------------------------------------------------------------------------------------|
| Does the child attend school?                                   | <input type="radio"/> Yes <input type="radio"/> No <input type="radio"/> Unsure <input checked="" type="radio"/> Missing                                                                |
| If Yes, what year?                                              | <input type="text"/>                                                                                                                                                                    |
| Does the parent/carer have any concerns about learning?         | <input type="radio"/> Yes <input type="radio"/> No <input checked="" type="radio"/> Missing                                                                                             |
| If Yes, please specify:                                         | <input type="text"/>                                                                                                                                                                    |
| Does the parent/carer have any concerns about behaviour?        | <input type="radio"/> Yes <input type="radio"/> No <input checked="" type="radio"/> Missing                                                                                             |
| If Yes, please specify:                                         | <input type="text"/>                                                                                                                                                                    |
| Does the teacher have any concerns about learning or behaviour? | <input type="radio"/> Yes <input type="radio"/> No <input checked="" type="radio"/> Missing                                                                                             |
| If Yes, please specify:                                         | <input type="text"/>                                                                                                                                                                    |
| What marks does your child receive on their report card?        | <input type="radio"/> Above average<br><input type="radio"/> Average<br><input type="radio"/> Below average<br><input type="radio"/> Unsure<br><input checked="" type="radio"/> Missing |
| Has the child been suspended / expelled from school             | <input type="radio"/> Yes <input type="radio"/> No <input checked="" type="radio"/> Missing                                                                                             |
| Comments                                                        | <input type="text"/>                                                                                                                                                                    |
| Has the child moved schools in the past 12 months               | <input type="radio"/> Yes <input type="radio"/> No <input checked="" type="radio"/> Missing                                                                                             |
| If yes, how many times?                                         | <input type="text"/>                                                                                                                                                                    |

### G. NUTRITION

|                                                 |                                                                                             |
|-------------------------------------------------|---------------------------------------------------------------------------------------------|
| Was the child ever breastfed?                   | <input type="radio"/> Yes <input type="radio"/> No <input checked="" type="radio"/> Missing |
| If Yes, what age was the breastfeeding stopped? | <input type="text"/> months                                                                 |
| Was the child ever bottle fed?                  | <input type="radio"/> Yes <input type="radio"/> No <input checked="" type="radio"/> Missing |

|                                                                                                                            |                                                                                                                                                                                                                                                    |
|----------------------------------------------------------------------------------------------------------------------------|----------------------------------------------------------------------------------------------------------------------------------------------------------------------------------------------------------------------------------------------------|
| Is the child currently bottle fed?                                                                                         | <input type="radio"/> Yes <input type="radio"/> No <input checked="" type="radio"/> Missing                                                                                                                                                        |
| If No, what age was the bottle feeding stopped?                                                                            | <input type="text"/> months                                                                                                                                                                                                                        |
| What age did the child start solids?                                                                                       | <input type="text"/> months                                                                                                                                                                                                                        |
| What was their first solid food?                                                                                           | <input type="text"/>                                                                                                                                                                                                                               |
| <b>What is the child's typical diet?</b>                                                                                   |                                                                                                                                                                                                                                                    |
| Breakfast:                                                                                                                 | <input type="text"/>                                                                                                                                                                                                                               |
| Lunch:                                                                                                                     | <input type="text"/>                                                                                                                                                                                                                               |
| Dinner:                                                                                                                    | <input type="text"/>                                                                                                                                                                                                                               |
| Snacks:                                                                                                                    | <input type="text"/>                                                                                                                                                                                                                               |
| What is the vegetable and fruit component of this diet?                                                                    | <input type="radio"/> None<br><input type="radio"/> Less than 5 serves of vegetables and 2 serves of fruit<br><input type="radio"/> Equal to or more than 5 serves of vegetables and 2 serves of fruit<br><input checked="" type="radio"/> Missing |
| How many times in the past week has the child had take away food?                                                          | <input type="text"/>                                                                                                                                                                                                                               |
| Since this time yesterday has the baby/child had any of the following?                                                     |                                                                                                                                                                                                                                                    |
| Flavoured milk:                                                                                                            | <input type="radio"/> Yes <input type="radio"/> No <input checked="" type="radio"/> Missing                                                                                                                                                        |
| Tea:                                                                                                                       | <input type="radio"/> Yes <input type="radio"/> No <input checked="" type="radio"/> Missing                                                                                                                                                        |
| Soft drink/cordial:                                                                                                        | <input type="radio"/> Yes <input type="radio"/> No <input checked="" type="radio"/> Missing                                                                                                                                                        |
| Fruit juice:                                                                                                               | <input type="radio"/> Yes <input type="radio"/> No <input checked="" type="radio"/> Missing                                                                                                                                                        |
| Water:                                                                                                                     | <input type="radio"/> Yes <input type="radio"/> No <input checked="" type="radio"/> Missing                                                                                                                                                        |
| Any concerns about diet?                                                                                                   | <input type="radio"/> Yes <input type="radio"/> No <input checked="" type="radio"/> Missing                                                                                                                                                        |
| If Yes, please specify:                                                                                                    | <input type="text"/>                                                                                                                                                                                                                               |
| <b>Activity</b>                                                                                                            |                                                                                                                                                                                                                                                    |
| Did the child exercise / play sport?                                                                                       | <input type="radio"/> Yes <input type="radio"/> No <input checked="" type="radio"/> Missing                                                                                                                                                        |
| How often in a week is the child physically active?                                                                        | <input type="text"/>                                                                                                                                                                                                                               |
| <i>A session is &gt; 30 mins exercise that raised their heart rate or caused them to huff and puff.</i>                    |                                                                                                                                                                                                                                                    |
| How much time (minutes) did the child spend on screen-based media for fun in the previous day (or most recent school day)? | <input type="text"/>                                                                                                                                                                                                                               |
| <i>Screen based media includes watching DVDs, playing video or computer games, internet chatrooms.</i>                     |                                                                                                                                                                                                                                                    |
| Any other                                                                                                                  | <input type="text"/>                                                                                                                                                                                                                               |

comments/observations related to nutrition/physical activity?:

### G. PARENTAL SUBSTANCE USE

#### Smoking

|                                                                                            |                                                                                                                          |
|--------------------------------------------------------------------------------------------|--------------------------------------------------------------------------------------------------------------------------|
| Does anyone living in the household currently smoke regularly?                             | <input type="radio"/> Yes <input type="radio"/> No <input checked="" type="radio"/> Missing                              |
| If Yes, does anyone smoke inside the house?                                                | <input type="radio"/> Yes <input type="radio"/> No <input checked="" type="radio"/> Missing                              |
| If Yes, please state the relationship to the child: Mother, Father, Other (please specify) | <input type="text"/>                                                                                                     |
| If Yes, do they want assistance to quit smoking?                                           | <input type="radio"/> Yes <input type="radio"/> No <input type="radio"/> Unsure <input checked="" type="radio"/> Missing |

#### Alcohol \*Based on current national alcohol guidelines

|                                                        |                                                                                                                                                                                                                                                                                                     |
|--------------------------------------------------------|-----------------------------------------------------------------------------------------------------------------------------------------------------------------------------------------------------------------------------------------------------------------------------------------------------|
| Does the child's mother drink alcohol?                 | <input type="radio"/> Yes <input type="radio"/> No <input checked="" type="radio"/> Missing                                                                                                                                                                                                         |
| If Yes, please state if harmful or non-harmful levels: | <input type="checkbox"/> > 2 std drinks/day avg; drinks 6-7 days/wk; > 14 std drinks/wk<br><input type="checkbox"/> ≤ 2 std drinks/day, 1-2 alcohol free days/wk; <14 std drinks/wk<br><input type="checkbox"/> > 4 std drinks on any one day<br><input checked="" type="checkbox"/> Missing        |
| Does the child's father drink alcohol?                 | <input type="radio"/> Yes <input type="radio"/> No <input checked="" type="radio"/> Missing                                                                                                                                                                                                         |
| If Yes, please state if harmful or non-harmful levels: | <input type="checkbox"/> > 4 std drinks/day avg or drinks 6-7 days/wk or > 28 std drinks/wk<br><input type="checkbox"/> ≤ 4 std drinks/day, 1-2 alcohol free days/wk or < 28 std drinks/wk<br><input type="checkbox"/> > 6 std drinks on any one day<br><input checked="" type="checkbox"/> Missing |

#### Other Substances

|                                           |                                                                                             |                                                                                                                                                                    |
|-------------------------------------------|---------------------------------------------------------------------------------------------|--------------------------------------------------------------------------------------------------------------------------------------------------------------------|
| Does a parent/carer use other substances? | <input type="radio"/> Yes <input type="radio"/> No <input checked="" type="radio"/> Missing |                                                                                                                                                                    |
| Marijuana                                 | <input type="radio"/> Yes <input type="radio"/> No <input checked="" type="radio"/> Missing | <input type="radio"/> Daily <input type="radio"/> Weekly <input type="radio"/> Monthly <input type="radio"/> Occasionally <input checked="" type="radio"/> Missing |
| Amphetamines/Ice                          | <input type="radio"/> Yes <input type="radio"/> No <input checked="" type="radio"/> Missing | <input type="radio"/> Daily <input type="radio"/> Weekly <input type="radio"/> Monthly <input type="radio"/> Occasionally <input checked="" type="radio"/> Missing |
| Heroin                                    | <input type="radio"/> Yes <input type="radio"/> No <input checked="" type="radio"/> Missing | <input type="radio"/> Daily <input type="radio"/> Weekly <input type="radio"/> Monthly <input type="radio"/> Occasionally <input checked="" type="radio"/> Missing |
| Cocaine                                   | <input type="radio"/> Yes <input type="radio"/> No <input checked="" type="radio"/> Missing | <input type="radio"/> Daily <input type="radio"/> Weekly <input type="radio"/> Monthly <input type="radio"/> Occasionally <input checked="" type="radio"/> Missing |
| Inhaled solvents                          | <input type="radio"/> Yes <input type="radio"/> No <input checked="" type="radio"/> Missing | <input type="radio"/> Daily <input type="radio"/> Weekly <input type="radio"/> Monthly <input type="radio"/> Occasionally <input checked="" type="radio"/> Missing |
| Methadone                                 | <input type="radio"/> Yes <input type="radio"/> No <input checked="" type="radio"/> Missing | <input type="radio"/> Daily <input type="radio"/> Weekly <input type="radio"/> Monthly <input type="radio"/> Occasionally <input checked="" type="radio"/> Missing |

|                                                                                                                                                                                                                                                                                        |                                                                                             |
|----------------------------------------------------------------------------------------------------------------------------------------------------------------------------------------------------------------------------------------------------------------------------------------|---------------------------------------------------------------------------------------------|
| Were any problems with gross motor development identified:                                                                                                                                                                                                                             | <input type="radio"/> Yes <input type="radio"/> No <input checked="" type="radio"/> Missing |
| If yes, comment:                                                                                                                                                                                                                                                                       |                                                                                             |
| Were any problems with fine motor development identified:                                                                                                                                                                                                                              | <input type="radio"/> Yes <input type="radio"/> No <input checked="" type="radio"/> Missing |
| If yes, comment:                                                                                                                                                                                                                                                                       |                                                                                             |
| Were any problems with language development identified:                                                                                                                                                                                                                                | <input type="radio"/> Yes <input type="radio"/> No <input checked="" type="radio"/> Missing |
| If yes, comment:                                                                                                                                                                                                                                                                       |                                                                                             |
| Were any problems with social development identified:                                                                                                                                                                                                                                  | <input type="radio"/> Yes <input type="radio"/> No <input checked="" type="radio"/> Missing |
| If yes, comment:                                                                                                                                                                                                                                                                       |                                                                                             |
| Assessment Outcome:                                                                                                                                                                                                                                                                    |                                                                                             |
| <input type="radio"/> Satisfactory<br><input type="radio"/> Recheck (child not able to be adequately assessed)<br><input type="radio"/> Known deficit<br><input type="radio"/> Review (concerns/mild delay)<br><input type="radio"/> Refer<br><input checked="" type="radio"/> Missing |                                                                                             |

### B. DYNAMICS

|                                                                                  |                                                                                             |
|----------------------------------------------------------------------------------|---------------------------------------------------------------------------------------------|
| Please comment on the interaction between parent/carer and child (if indicated): |                                                                                             |
| Problem identified:                                                              | <input type="radio"/> Yes <input type="radio"/> No <input checked="" type="radio"/> Missing |
| Behavioural intervention could be of use:                                        | <input type="radio"/> Yes <input type="radio"/> No <input checked="" type="radio"/> Missing |
| Comment:                                                                         |                                                                                             |

### C. PHYSICAL ASSESSMENT

|                                                 |                                |
|-------------------------------------------------|--------------------------------|
| Weight:                                         | _____ <b>kg</b>                |
| Patient's height:                               | _____ <b>cm</b>                |
| Waist circumference:                            | _____ <b>cm</b> (at umbilicus) |
| Blood pressure (SDB/DBP):                       | ____/____ (Systolic/Diastolic) |
| Pulse rate:                                     | _____                          |
| <b>Nurse's suggestion for doctor to review:</b> |                                |



### C. VISION

|               |                                                                                                                   |                                                      |                                                                                                     |
|---------------|-------------------------------------------------------------------------------------------------------------------|------------------------------------------------------|-----------------------------------------------------------------------------------------------------|
| Visual Acuity | <input type="radio"/> With glasses <input type="radio"/> Without glasses <input checked="" type="radio"/> Missing | R6/ <input type="text"/><br>L6/ <input type="text"/> | (Need referral if unable to read 3 symbols on 6/12 line or 2 or more line differences between eyes) |
|---------------|-------------------------------------------------------------------------------------------------------------------|------------------------------------------------------|-----------------------------------------------------------------------------------------------------|

### D. ORAL HEALTH

|                                                        |                                                                                                                                                                              |
|--------------------------------------------------------|------------------------------------------------------------------------------------------------------------------------------------------------------------------------------|
| <b>Oral Health</b>                                     |                                                                                                                                                                              |
| Are the child's teeth brushed twice daily?             | <input type="radio"/> Yes <input type="radio"/> No <input type="radio"/> N/A <input checked="" type="radio"/> Missing                                                        |
| If so, who brushes them?                               | <input type="radio"/> Child <input type="radio"/> Parent/Care giver <input type="radio"/> Unsure <input checked="" type="radio"/> Missing                                    |
| If child brushes their own teeth, are they supervised? | <input type="radio"/> Yes <input type="radio"/> No <input checked="" type="radio"/> Missing                                                                                  |
| Does the child have gum disease?                       | <input type="radio"/> Yes <input type="radio"/> No <input checked="" type="radio"/> Missing                                                                                  |
| Does the child have dental caries?                     | <input type="radio"/> Yes <input type="radio"/> No <input checked="" type="radio"/> Missing                                                                                  |
| If yes please specify which stage:                     | <input type="radio"/> Stage 1<br><input type="radio"/> Stage 2<br><input type="radio"/> Stage 3<br><input type="radio"/> Stage 4<br><input checked="" type="radio"/> Missing |
| Other dental problems (please specify):                | <input type="text"/><br><input type="text"/>                                                                                                                                 |

### PART 3. MEDICAL ASSESSMENT

#### A. ADOLESCENT HEALTH (Questions directed to the child if over 10 or less than 10 if appropriate)

|                                                                       |                                                                                             |
|-----------------------------------------------------------------------|---------------------------------------------------------------------------------------------|
| <b>Smoking</b>                                                        |                                                                                             |
| Do you smoke regularly?                                               | <input type="radio"/> Yes <input type="radio"/> No <input checked="" type="radio"/> Missing |
| If Yes, how many per day?                                             | <input type="text"/>                                                                        |
| <b>Alcohol</b>                                                        |                                                                                             |
| Do you drink alcohol?                                                 | <input type="radio"/> Yes <input type="radio"/> No <input checked="" type="radio"/> Missing |
| If Yes, how many standard drinks per week?                            | <input type="text"/>                                                                        |
| Are you concerned that your alcohol intake might be harmful?          | <input type="radio"/> Yes <input type="radio"/> No <input checked="" type="radio"/> Missing |
| <b>Caffeine (Coffee, tea, cola, iced coffee, V, Red Bull, other):</b> |                                                                                             |
| Drinks per day:                                                       | <input type="text"/>                                                                        |
| <b>Other Substances</b>                                               |                                                                                             |
| Opiates (heroin, methadone, codeine, endone, MS contin)               | <input type="radio"/> Yes <input type="radio"/> No <input checked="" type="radio"/> Missing |
| Cannabis/Yarndi                                                       | <input type="radio"/> Yes <input type="radio"/> No <input checked="" type="radio"/> Missing |

|                                                              |                                                                                             |
|--------------------------------------------------------------|---------------------------------------------------------------------------------------------|
| Amphetamines (speed, base, crystal meth, ice, ecstasy, MDMA) | <input type="radio"/> Yes <input type="radio"/> No <input checked="" type="radio"/> Missing |
| Cocaine                                                      | <input type="radio"/> Yes <input type="radio"/> No <input checked="" type="radio"/> Missing |
| Hallucinogen (LSD, magic mushrooms)                          | <input type="radio"/> Yes <input type="radio"/> No <input checked="" type="radio"/> Missing |
| Volatile Substances (paints, glues)                          | <input type="radio"/> Yes <input type="radio"/> No <input checked="" type="radio"/> Missing |
| Prescription medicine (valium, temazepam)                    | <input type="radio"/> Yes <input type="radio"/> No <input checked="" type="radio"/> Missing |
| Over the counter medicine (pseudoephedrine)                  | <input type="radio"/> Yes <input type="radio"/> No <input checked="" type="radio"/> Missing |
|                                                              |                                                                                             |
| Comments:                                                    | <input type="text"/>                                                                        |
|                                                              |                                                                                             |
| <b>Sexual and Reproductive Health</b>                        |                                                                                             |
| Are you sexually active?                                     | <input type="radio"/> Yes <input type="radio"/> No <input checked="" type="radio"/> Missing |
| If Yes, do you use protection?                               | <input type="radio"/> Yes <input type="radio"/> No <input checked="" type="radio"/> Missing |
| If Yes, specify details:                                     | <input type="text"/>                                                                        |
|                                                              |                                                                                             |

## B. PHYSICAL EXAMINATION

|                                     |                                                                                             |                          |
|-------------------------------------|---------------------------------------------------------------------------------------------|--------------------------|
| <b>Eyes</b>                         |                                                                                             |                          |
| Squint                              | <input type="radio"/> Yes <input type="radio"/> No <input checked="" type="radio"/> Missing |                          |
| <b>Ears (Tympanic membrane; TM)</b> | <b>L</b>                                                                                    | <b>R</b>                 |
| TM Normal                           | <input type="checkbox"/>                                                                    | <input type="checkbox"/> |
| TM obscured by wax                  | <input type="checkbox"/>                                                                    | <input type="checkbox"/> |
| TM dry perforation                  | <input type="checkbox"/>                                                                    | <input type="checkbox"/> |
| TM wet perforation                  | <input type="checkbox"/>                                                                    | <input type="checkbox"/> |
| Tympanic membrane bulging           | <input type="checkbox"/>                                                                    | <input type="checkbox"/> |
| Other                               | <input type="checkbox"/>                                                                    | <input type="checkbox"/> |
| Please specify:                     | <input type="text"/>                                                                        |                          |
|                                     |                                                                                             |                          |

|                                             |                                                                                                      |                                                                                                                                                           |
|---------------------------------------------|------------------------------------------------------------------------------------------------------|-----------------------------------------------------------------------------------------------------------------------------------------------------------|
| Skin Problems?                              | <input type="radio"/> Yes <input type="radio"/> No <input checked="" type="radio"/> Missing          |                                                                                                                                                           |
| Impetigo or boils                           | <input type="radio"/> Yes <input type="radio"/> No <input checked="" type="radio"/> Missing          |                                                                                                                                                           |
| Sores (more than three)                     | <input type="radio"/> Yes <input type="radio"/> No <input checked="" type="radio"/> Missing          |                                                                                                                                                           |
| Scabies                                     | <input type="radio"/> Yes <input type="radio"/> No <input checked="" type="radio"/> Missing          |                                                                                                                                                           |
| Ringworm                                    | <input type="radio"/> Yes <input type="radio"/> No <input checked="" type="radio"/> Missing          |                                                                                                                                                           |
| Other                                       | <input type="radio"/> Yes <input type="radio"/> No <input checked="" type="radio"/> Missing          |                                                                                                                                                           |
| Please specify:                             | <input type="text"/>                                                                                 |                                                                                                                                                           |
| <b>Heart</b>                                |                                                                                                      |                                                                                                                                                           |
| Cardiac Auscultation                        | <input type="radio"/> Normal <input type="radio"/> Abnormal <input checked="" type="radio"/> Missing |                                                                                                                                                           |
| If abnormal, please specify:                | <input type="text"/>                                                                                 |                                                                                                                                                           |
| <b>Respiratory</b>                          |                                                                                                      |                                                                                                                                                           |
| Throat examination                          | <input type="radio"/> Normal <input type="radio"/> Abnormal <input checked="" type="radio"/> Missing |                                                                                                                                                           |
| If abnormality detected, please specify:    | <input type="text"/>                                                                                 |                                                                                                                                                           |
| Chest examination                           | <input type="radio"/> Normal <input type="radio"/> Abnormal <input checked="" type="radio"/> Missing |                                                                                                                                                           |
| Respiratory illness detected                | <input type="radio"/> Yes <input type="radio"/> No <input checked="" type="radio"/> Missing          |                                                                                                                                                           |
| If abnormality detected, please specify:    | <input type="text"/>                                                                                 |                                                                                                                                                           |
| <b>Abdomen (if indicated)</b>               |                                                                                                      |                                                                                                                                                           |
| Abdominal examination                       | <input type="radio"/> Normal <input type="radio"/> Abnormal <input checked="" type="radio"/> Missing |                                                                                                                                                           |
| If abnormality detected, please specify:    | <input type="text"/>                                                                                 |                                                                                                                                                           |
| <b>Other examinations conducted:</b>        | <input type="text"/>                                                                                 |                                                                                                                                                           |
| How has your mood been over the last month? | Happy?                                                                                               | <input type="radio"/> No <input type="radio"/> A little <input type="radio"/> A lot <input type="radio"/> Unsure <input checked="" type="radio"/> Missing |
|                                             | So sad nothing could make you happy?                                                                 | <input type="radio"/> No <input type="radio"/> A little <input type="radio"/> A lot <input type="radio"/> Unsure <input checked="" type="radio"/> Missing |
|                                             | So worried or scared you felt sick in the belly?                                                     | <input type="radio"/> No <input type="radio"/> A little <input type="radio"/> A lot <input type="radio"/> Unsure <input checked="" type="radio"/> Missing |
|                                             | So angry or wild you couldn't walk away and cool down?                                               | <input type="radio"/> No <input type="radio"/> A little <input type="radio"/> A lot <input type="radio"/> Unsure <input checked="" type="radio"/> Missing |

|                          |                                                                                     |                                                                                                                                                           |
|--------------------------|-------------------------------------------------------------------------------------|-----------------------------------------------------------------------------------------------------------------------------------------------------------|
|                          | Like you wanted to harm yourself?                                                   | <input type="radio"/> No <input type="radio"/> A little <input type="radio"/> A lot <input type="radio"/> Unsure <input checked="" type="radio"/> Missing |
|                          | Peer relations problems identified                                                  | <input type="radio"/> Yes <input type="radio"/> No <input type="radio"/> Missing                                                                          |
|                          | Comments:                                                                           | <input type="text"/>                                                                                                                                      |
|                          | If mental health concerns, please specify:                                          | <input type="text"/>                                                                                                                                      |
| Known Health Conditions: | <input type="checkbox"/> Asthma<br><input type="checkbox"/> Rheumatic Heart Disease |                                                                                                                                                           |

### PROBLEM LIST

|  |  |  |
|--|--|--|
|  |  |  |
|--|--|--|

### C. DIAGNOSIS

|                                                |                                                                                             |
|------------------------------------------------|---------------------------------------------------------------------------------------------|
| Was a new diagnosis made?                      | <input type="radio"/> Yes <input type="radio"/> No <input checked="" type="radio"/> Missing |
| If Yes, specify details:                       | <input type="text"/>                                                                        |
| <b>Significant health problems and issues:</b> | <input type="text"/>                                                                        |
|                                                | <input type="text"/>                                                                        |

### PART 4: ACTIONS

|                      |                                                                                             |
|----------------------|---------------------------------------------------------------------------------------------|
| Was a referral made? | <input type="radio"/> Yes <input type="radio"/> No <input checked="" type="radio"/> Missing |
| If Yes, outline      | <input type="text"/>                                                                        |
| Was advice given?    | <input type="radio"/> Yes <input type="radio"/> No <input checked="" type="radio"/> Missing |
| If Yes, outline      | <input type="text"/>                                                                        |
| Was medication       | <input type="text"/>                                                                        |

|                                                      |                                                                                             |
|------------------------------------------------------|---------------------------------------------------------------------------------------------|
| recommended?                                         | <input type="radio"/> Yes <input type="radio"/> No <input checked="" type="radio"/> Missing |
| If Yes, outline                                      | <input type="text"/>                                                                        |
| Were vaccinations provided during this health check? | <input type="radio"/> Yes <input type="radio"/> No <input checked="" type="radio"/> Missing |
| If Yes, outline                                      | <input type="text"/>                                                                        |
| Other intervention?                                  | <input type="radio"/> Yes <input type="radio"/> No <input checked="" type="radio"/> Missing |
| If Yes, outline                                      | <input type="text"/>                                                                        |
| Date of health check:                                | <input type="text"/>                                                                        |

**Health Check Completed by:**

**Sign Off**

**Completed?** (Select this only when Health Check is complete)

**User Name**

**Password**

**Save**

Health Check Completed by:

Signed:

Date:
